# Supplementary material for: Selection, Phenotyping and Identification of Acid and Hydrogen Peroxide Producing Bacteria from Vaginal Samples of Canadian and East African Women
Source: PubMed Central journal article supplement (PMC3402533; doi:10.1371/journal.pone.0041217), 2012-07-23
Supplement: pone.0041217.s002.pdf [file pone.0041217.s002.pdf]

Table S2. Characteristics of individuals providing vaginal samples in Winnipeg (N=16)

| Study# | # samples | BV diagnosis <sup>1</sup> | Sample intervals (days) | Age <sup>2</sup> | Sexually active <sup>2</sup> | Birth control <sup>2</sup> |
|--------|-----------|---------------------------|-------------------------|------------------|------------------------------|----------------------------|
| 1      | 4         | 1,1,1,1                   | 7,14,7                  | 14               | N                            | N                          |
| 2      | 4         | 3,1,1,1                   | 7,7,7                   | 14               | N                            | N                          |
| 5      | 3         | 3,3,3                     | 14,7                    | 15               | N                            | N                          |
| 6      | 1         | 3                         | -                       | 15               | Y                            | Oral                       |
| 7      | 1         | 3                         | -                       | 16               | Y                            | Transdermal                |
| 9      | 2         | 1,1                       | 8                       | 14               | Y                            | Injection                  |
| 11     | 2         | 1,2                       | 7                       | 14               | Y                            | Injection                  |
| 13     | 3         | 1,1,1                     | 15,21                   | 16               | Y                            | Intravaginal               |
| 14     | 3         | 2,1,1                     | 9,7                     | 17               | Y                            | Injection                  |
| 16     | 4         | 2,1,1,2                   | 12,8,9                  | 17               | Y                            | Injection                  |
| 18     | 3         | 3,1,3                     | 16,12                   | 15               | Y                            | Oral                       |
| 21     | 3         | 2,1,2                     | 7,7                     | 18               | Y                            | Oral                       |
| 22     | 1         | 3                         | -                       | 15               | Y                            | N                          |
| 25     | 2         | 3,3                       | 8                       | 17               | Y                            | N                          |
| 30     | 3         | 1,3,2                     | 8,7                     | 14               | Y                            | Transdermal                |
| 31     | 3         | 3,1,1                     | 7,7                     | 16               | N                            | N                          |

<sup>1</sup> BV diagnosis by Gram stain analysis at each sampling: 1 = BV-, 2=BV-intermediate,

<sup>2</sup> Self-reported on written questionnaire
