# Supplementary material for: Selection, Phenotyping and Identification of Acid and Hydrogen Peroxide Producing Bacteria from Vaginal Samples of Canadian and East African Women
Source: PubMed Central journal article supplement (PMC3402533; doi:10.1371/journal.pone.0041217), 2012-07-23
Supplement: pone.0041217.s003.pdf [file pone.0041217.s003.pdf]

Table S3. Characteristics of individuals providing vaginal samples in Nairobi (N=96)

|                                                |          |
|------------------------------------------------|----------|
| <b>Serostatus</b>                              |          |
| HIV-                                           | 64 (67%) |
| HIV+                                           | 32 (33%) |
| <b>Age</b>                                     |          |
| Median                                         | 34       |
| Range                                          | 21-56    |
| <b>Current sex work</b>                        |          |
| Active                                         | 87 (91%) |
| Stopped                                        | 9 (9%)   |
| <b>Menopause</b>                               |          |
| Yes                                            | 3 (3%)   |
| No                                             | 92 (96%) |
| Missing                                        | 1 (1%)   |
| <b>Pregnant</b>                                |          |
| Yes                                            | 2 (2%)   |
| No                                             | 93 (97%) |
| Missing                                        | 1 (1%)   |
| <b>Hormonal contraception</b>                  |          |
| No                                             | 68 (71%) |
| Oral                                           | 10 (10%) |
| Injection                                      | 16 (17%) |
| Missing                                        | 2 (2%)   |
| <b>Vaginal symptoms<sup>1</sup></b>            |          |
| Any                                            | 10 (10%) |
| Missing                                        | 1 (1%)   |
| <b>Other diagnoses<sup>2</sup></b>             |          |
| Any                                            | 2 (2%)   |
| Missing                                        | 1 (1%)   |
| <b>Current sexually transmitted infections</b> |          |
| Syphilis                                       | 5 (5%)   |
| Gonorrhoea                                     | 2 (2%)   |
| Trichomonas                                    | 3 (3%)   |
| Any                                            | 10 (11%) |
| Missing                                        | 1 (1%)   |
| <b>BV diagnosis<sup>3</sup></b>                |          |
| BV-                                            | 42 (44%) |
| BV-intermediate                                | 26 (27%) |
| BV+                                            | 28 (29%) |

<sup>1</sup> Including discharge, itch and dysuria

<sup>2</sup> Including ulcers, candidiasis, cystitis, cervicitis

<sup>3</sup> BV diagnosis by Gram stain analysis
